# Supplementary material for: The Unfolded Protein Response Is Associated with Cancer Proliferation and Worse Survival in Hepatocellular Carcinoma
Source: MDPI journal article supplement (doi:10.3390/cancers13174443), 2021-09-03
Supplement: s1 [file s1]

# The Unfolded Protein Response Is Associated with Cancer Proliferation and Worse Survival in Hepatocellular Carcinoma

Ankit Patel, Masanori Oshi, Li Yan, Ryusei Matsuyama, Itaru Endo and Kazuaki Takabe

**Table S1.** Member genes of the Unfolded protein response score.

| Gene Name       | Gene Description                                              |
|-----------------|---------------------------------------------------------------|
| <i>ALDH18A1</i> | aldehyde dehydrogenase 18 family member A1                    |
| <i>ARFGAP1</i>  | ADP ribosylation factor GTPase activating protein 1           |
| <i>ASNS</i>     | asparagine synthetase                                         |
| <i>ATF3</i>     | activating transcription factor 3                             |
| <i>ATF4</i>     | activating transcription factor 4                             |
| <i>ATF6</i>     | activating transcription factor 6                             |
| <i>ATP6V0D1</i> | ATPase H <sup>+</sup> transporting V0 subunit d1              |
| <i>BAG3</i>     | BAG cochaperone 3                                             |
| <i>BANF1</i>    | BAF nuclear assembly factor 1                                 |
| <i>CALR</i>     | calreticulin                                                  |
| <i>CCL2</i>     | C-C motif chemokine ligand 2                                  |
| <i>CEBPB</i>    | CCAAT enhancer binding protein beta                           |
| <i>CEBPG</i>    | CCAAT enhancer binding protein gamma                          |
| <i>CHAC1</i>    | ChaC glutathione specific gamma-glutamylcyclotransferase 1    |
| <i>CKS1B</i>    | CDC28 protein kinase regulatory subunit 1B                    |
| <i>CNOT2</i>    | CCR4-NOT transcription complex subunit 2                      |
| <i>CNOT4</i>    | CCR4-NOT transcription complex subunit 4                      |
| <i>CNOT6</i>    | CCR4-NOT transcription complex subunit 6                      |
| <i>CXXC1</i>    | CXXC finger protein 1                                         |
| <i>DCP1A</i>    | decapping mRNA 1A                                             |
| <i>DCP2</i>     | decapping mRNA 2                                              |
| <i>DCTN1</i>    | dynactin subunit 1                                            |
| <i>DDIT4</i>    | DNA damage inducible transcript 4                             |
| <i>DDX10</i>    | DEAD-box helicase 10                                          |
| <i>DKC1</i>     | dyskerin pseudouridine synthase 1                             |
| <i>DNAJA4</i>   | DnaJ heat shock protein family (Hsp40) member A4              |
| <i>DNAJB9</i>   | DnaJ heat shock protein family (Hsp40) member B9              |
| <i>DNAJC3</i>   | DnaJ heat shock protein family (Hsp40) member C3              |
| <i>EDC4</i>     | enhancer of mRNA decapping 4                                  |
| <i>EDEM1</i>    | ER degradation enhancing alpha-mannosidase like protein 1     |
| <i>EEF2</i>     | eukaryotic translation elongation factor 2                    |
| <i>EIF2AK3</i>  | eukaryotic translation initiation factor 2 alpha kinase 3     |
| <i>EIF2S1</i>   | eukaryotic translation initiation factor 2 subunit alpha      |
| <i>EIF4A1</i>   | eukaryotic translation initiation factor 4A1                  |
| <i>EIF4A2</i>   | eukaryotic translation initiation factor 4A2                  |
| <i>EIF4A3</i>   | eukaryotic translation initiation factor 4A3                  |
| <i>EIF4E</i>    | eukaryotic translation initiation factor 4E                   |
| <i>EIF4EBP1</i> | eukaryotic translation initiation factor 4E binding protein 1 |
| <i>EIF4G1</i>   | eukaryotic translation initiation factor 4 gamma 1            |
| <i>ERN1</i>     | endoplasmic reticulum to nucleus signaling 1                  |
| <i>ERO1L</i>    | endoplasmic reticulum oxidoreductase 1 alpha                  |
| <i>EXOC2</i>    | exocyst complex component 2                                   |
| <i>EXOSC1</i>   | exosome component 1                                           |
| <i>EXOSC10</i>  | exosome component 10                                          |
| <i>EXOSC2</i>   | exosome component 2                                           |
| <i>EXOSC4</i>   | exosome component 4                                           |
| <i>EXOSC5</i>   | exosome component 5                                           |

|                |                                                                    |
|----------------|--------------------------------------------------------------------|
| <i>EXOSC9</i>  | exosome component 9                                                |
| <i>FKBP14</i>  | FKBP prolyl isomerase 14                                           |
| <i>FUS</i>     | FUS RNA binding protein                                            |
| <i>GEMIN4</i>  | gem nuclear organelle associated protein 4                         |
| <i>GOSR2</i>   | golgi SNAP receptor complex member 2                               |
| <i>H2AFX</i>   | H2A.X variant histone                                              |
| <i>HERPUD1</i> | homocysteine inducible ER protein with ubiquitin like domain 1     |
| <i>HSP90B1</i> | heat shock protein 90 beta family member 1                         |
| <i>HSPA5</i>   | heat shock protein family A (Hsp70) member 5                       |
| <i>HSPA9</i>   | heat shock protein family A (Hsp70) member 9                       |
| <i>HYOU1</i>   | hypoxia up-regulated 1                                             |
| <i>IARS</i>    | isoleucyl-tRNA synthetase 1                                        |
| <i>IFIT1</i>   | interferon induced protein with tetratide repeats 1                |
| <i>IGFBP1</i>  | insulin like growth factor binding protein 1                       |
| <i>IMP3</i>    | IMP U3 small nucleolar ribonucleoprotein 3                         |
| <i>KDEL3</i>   | KDEL endoplasmic reticulum protein retention receptor 3            |
| <i>KHSRP</i>   | KH-type splicing regulatory protein                                |
| <i>KIF5B</i>   | kinesin family member 5B                                           |
| <i>LSM1</i>    | LSM1 homolog, mRNA degradation associated                          |
| <i>LSM4</i>    | LSM4 homolog, U6 small nuclear RNA and mRNA degradation associated |
| <i>MTHFD2</i>  | methylenetetrahydrofolate dehydrogenase (NADP+ dependent) 2        |
| <i>NFYA</i>    | nuclear transcription factor Y subunit alpha                       |
| <i>NFYB</i>    | nuclear transcription factor Y subunit beta                        |
| <i>NHP2</i>    | NHP2 ribonucleoprotein                                             |
| <i>NOLC1</i>   | nucleolar and coiled-body phosphoprotein 1                         |
| <i>NOP14</i>   | NOP14 nucleolar protein                                            |
| <i>NOP56</i>   | NOP56 ribonucleoprotein                                            |
| <i>NPM1</i>    | nucleophosmin 1                                                    |
| <i>OBFC2A</i>  | nucleic acid binding protein 1                                     |
| <i>PAIP1</i>   | poly(A) binding protein interacting protein 1                      |
| <i>PARN</i>    | poly(A)-specific ribonuclease                                      |
| <i>PDIA5</i>   | protein disulfide isomerase family A member 5                      |
| <i>PDIA6</i>   | protein disulfide isomerase family A member 6                      |
| <i>POP4</i>    | POP4 homolog, ribonuclease P/MRP subunit                           |
| <i>PREB</i>    | prolactin regulatory element binding                               |
| <i>PSAT1</i>   | phosphoserine aminotransferase 1                                   |
| <i>RPS14</i>   | ribosomal protein S14                                              |
| <i>RRP9</i>    | ribosomal RNA processing 9, U3 small nucleolar RNA binding protein |
| <i>SDAD1</i>   | SDA1 domain containing 1                                           |
| <i>SEC11A</i>  | SEC11 homolog A, signal peptidase complex subunit                  |
| <i>SEC31A</i>  | SEC31 homolog A, COPII coat complex component                      |
| <i>SERP1</i>   | stress associated endoplasmic reticulum protein 1                  |
| <i>SHC1</i>    | SHC adaptor protein 1                                              |
| <i>SKIV2L2</i> | Mtr4 exosome RNA helicase                                          |
| <i>SLC1A4</i>  | solute carrier family 1 member 4                                   |
| <i>SLC30A5</i> | solute carrier family 30 member 5                                  |
| <i>SLC7A5</i>  | solute carrier family 7 member 5                                   |
| <i>SPCS1</i>   | signal peptidase complex subunit 1                                 |
| <i>SPCS3</i>   | signal peptidase complex subunit 3                                 |
| <i>SRPR</i>    | SRP receptor subunit alpha                                         |
| <i>SRPRB</i>   | SRP receptor subunit beta                                          |
| <i>SSR1</i>    | signal sequence receptor subunit 1                                 |
| <i>STC2</i>    | stanniocalcin 2                                                    |
| <i>TARS</i>    | threonyl-tRNA synthetase 1                                         |
| <i>TATDN2</i>  | TatD DNase domain containing 2                                     |
| <i>TSPYL2</i>  | TSPY like 2                                                        |
| <i>TTC37</i>   | tetratricopeptide repeat domain 37                                 |
| <i>TUBB2A</i>  | tubulin beta 2A class IIa                                          |
| <i>VEGFA</i>   | vascular endothelial growth factor A                               |
| <i>WFS1</i>    | wolframin ER transmembrane glycoprotein                            |

|               |                                                                             |
|---------------|-----------------------------------------------------------------------------|
| <i>WIP1</i>   | WD repeat domain, phosphoinositide interacting 1                            |
| <i>XBP1</i>   | X-box binding protein 1                                                     |
| <i>XPOT</i>   | exportin for tRNA                                                           |
| <i>YIF1A</i>  | Yip1 interacting factor homolog A, membrane trafficking protein             |
| <i>YWHAZ</i>  | tyrosine 3-monooxygenase/tryptophan 5-monooxygenase activation protein zeta |
| <i>ZBTB17</i> | zinc finger and BTB domain containing 17                                    |

**Table S2.** Univariate and multivariate analysis with overall survival in the TCGA cohort.

|                  | HR   | 95%CI |      | <i>p</i> |   | HR   | 95%CI |      | <i>p</i> |   |
|------------------|------|-------|------|----------|---|------|-------|------|----------|---|
| >60 vs. 60 ≥     | 1.26 | 0.89  | 1.79 | 0.189    |   |      |       |      |          |   |
| WHITE vs. Others | 1.24 | 0.87  | 1.76 | 0.238    |   |      |       |      |          |   |
| III/IV vs. I/II  | 2.40 | 1.65  | 3.48 | <0.001   | * | 2.19 | 1.50  | 3.20 | <0.001   | * |
| G3/G4 vs. G1/G2  | 1.11 | 0.78  | 1.58 | 0.565    |   |      |       |      |          |   |
| High vs. Low     | 1.98 | 1.39  | 2.82 | <0.001   | * | 1.59 | 1.09  | 2.32 | 0.016    | * |

**Table S3.** Cox regression analysis of cell proliferation-related gene sets.

| DFS     | HR   | 95%CI |       | p      |
|---------|------|-------|-------|--------|
| UPR     | 3.45 | 1.81  | 6.60  | <0.001 |
| E2F     | 2.53 | 1.69  | 3.78  | <0.001 |
| G2M     | 2.58 | 1.68  | 3.95  | <0.001 |
| MYC v1  | 3.08 | 1.90  | 5.00  | <0.001 |
| MYC v2  | 2.89 | 1.80  | 4.65  | <0.001 |
| MITOTIC | 2.21 | 1.33  | 3.69  | 0.002  |
| MKI67   | 1.82 | 1.30  | 2.54  | <0.001 |
| DSS     | HR   | 95%CI |       | p      |
| UPR     | 6.21 | 2.65  | 14.55 | <0.001 |
| E2F     | 3.65 | 2.07  | 6.44  | <0.001 |
| G2M     | 3.86 | 2.12  | 7.03  | <0.001 |
| MYC v1  | 4.77 | 2.46  | 9.25  | <0.001 |
| MYC v2  | 3.32 | 1.76  | 6.27  | <0.001 |
| MITOTIC | 3.27 | 1.63  | 6.55  | <0.001 |
| MKI67   | 2.43 | 1.53  | 3.86  | <0.001 |
| OS      | HR   | 95%CI |       | p      |
| UPR     | 5.67 | 2.91  | 11.05 | <0.001 |
| E2F     | 2.73 | 1.78  | 4.20  | <0.001 |
| G2M     | 2.85 | 1.81  | 4.51  | <0.001 |
| MYC v1  | 3.61 | 2.17  | 6.00  | <0.001 |
| MYC v2  | 2.87 | 1.75  | 4.72  | <0.001 |
| MITOTIC | 2.44 | 1.43  | 4.16  | 0.001  |
| MKI67   | 1.27 | 1.15  | 1.42  | <0.001 |

**Table S4.** List of Software used in analysis.

| Software        | Version | Reference                                                                                                                                                                                                                                 |
|-----------------|---------|-------------------------------------------------------------------------------------------------------------------------------------------------------------------------------------------------------------------------------------------|
| R               | 4.1.0   | -                                                                                                                                                                                                                                         |
| GSEA            | 4.1.0   | Subramanian A, et. al. Gene set enrichment analysis: a knowledge-based approach for interpreting genome-wide expression profiles. Proc Natl Acad Sci U S A. 2005 Oct 25;102(43):15545-50. doi: 10.1073/pnas.0506580102. Epub 2005 Sep 30. |
| GSVA            | 1.38.2  | Hänzelmann S, et. al. GSVA: gene set variation analysis for microarray and RNA-seq data. BMC Bioinformatics. 2013 Jan 16;14:7. doi: 10.1186/1471-2105-14-7.                                                                               |
| Microsoft Excel | 16.0    | Microsoft Windows 10                                                                                                                                                                                                                      |

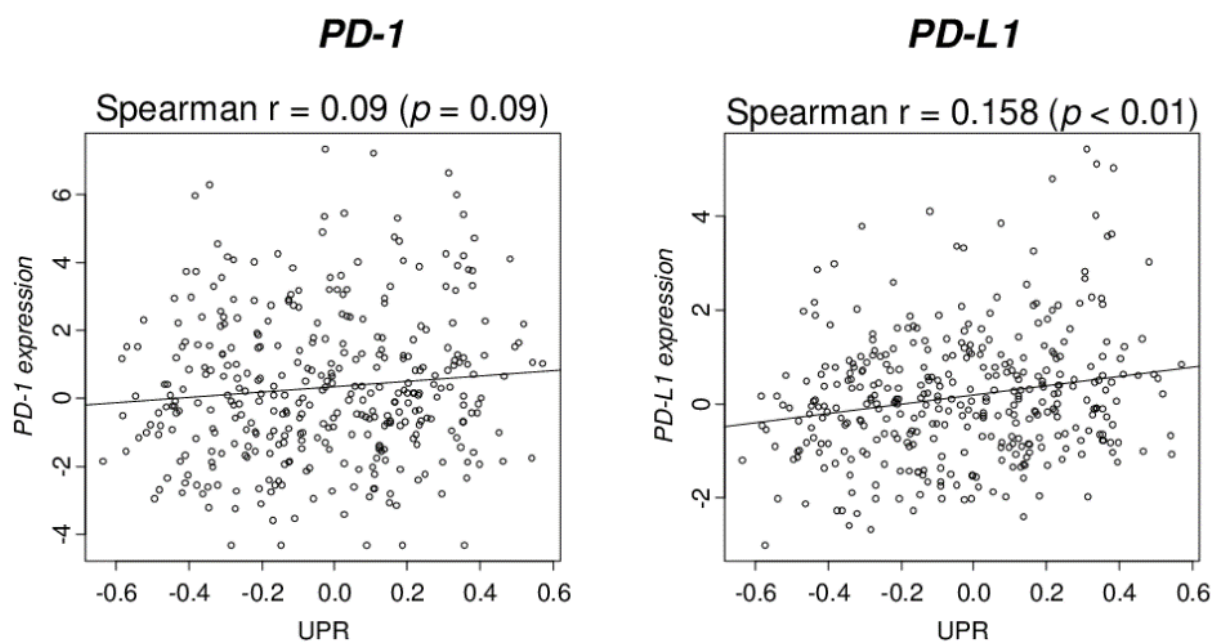

**Figure S1.** Co-relation curve of PD-1, PDL-1 expressions and UPR score.
